# Supplementary material
Source: MDPI journal article supplement (https://www.mdpi.com/2071-1050/12/11/4667)
Supplement: s1 [file s1]

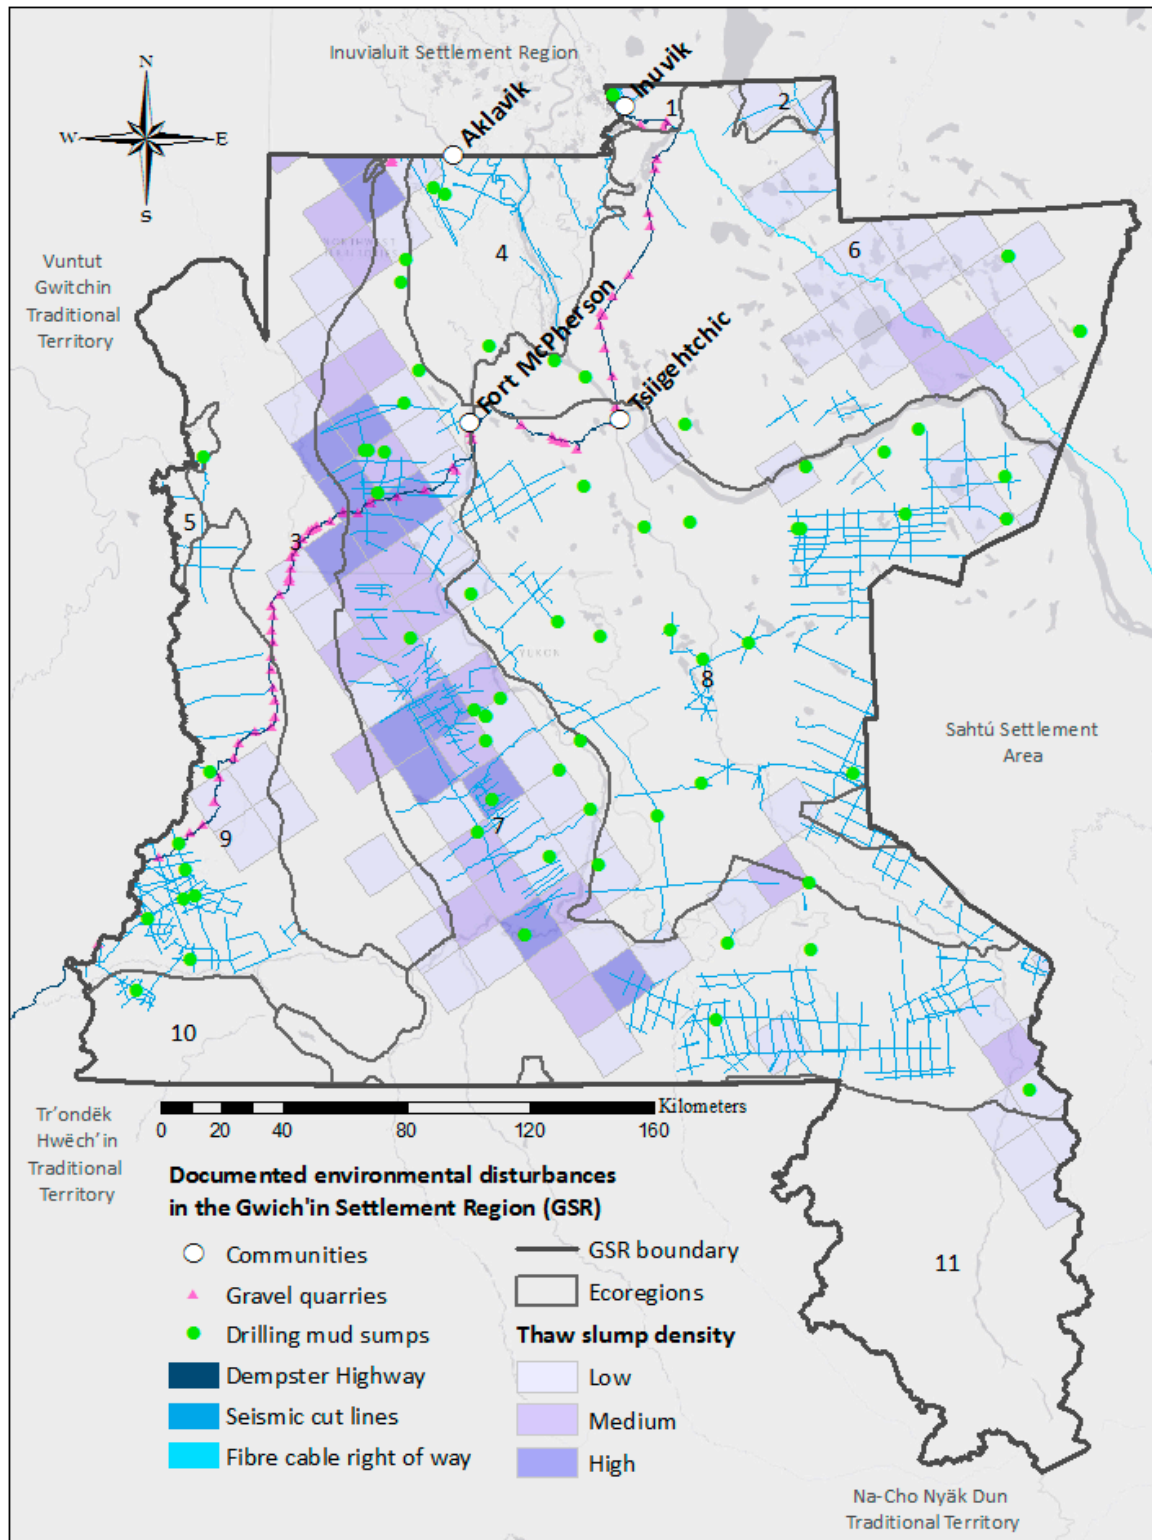

**Figure S1:** Map of the environmental disturbance data that were used in our analysis across ecoregions in the Gwich'in Settlement Region: 1. Tuktoyaktuk Coastal Plain, 2. Dease Arm Plain, 3. British-Richardson Mountains, 4. Mackenzie Delta, 5. Old Crow Basin, 6. Great Bear Lake Plain, 7. Peel River Plateau, 8. Fort McPherson Plain, 9. Eagle Plains, 10. North Ogilvie Mountains, 11. Mackenzie Mountains.
